# Supplementary material
Source: MDPI journal article supplement (https://www.mdpi.com/2673-7426/4/2/68)
Supplement: s1 [file s1]

## Supplement

### 1. Content of the primer3 parameter file

The primer3 parameter file specifies optimal size values in a specified range for the to-be-designed primers and probes, as well as their temperature optimum and range. In addition, various thresholds can be set for the stability of possible secondary structures formed by the primers and probes. The pipeline itself fills in the parameters without any given information as they contain relevant consensus regions for the design.

```
SEQUENCE_ID=  
SEQUENCE_TEMPLATE=  
SEQUENCE_EXCLUDED_REGION=  
SEQUENCE_INTERNAL_EXCLUDED_REGION=  
PRIMER_TASK=generic  
PRIMER_PICK_LEFT_PRIMER=1  
PRIMER_PICK_INTERNAL_OLIGO=1  
PRIMER_PICK_RIGHT_PRIMER=1  
PRIMER_OPT_SIZE=20  
PRIMER_MIN_SIZE=15  
PRIMER_MAX_SIZE=25  
PRIMER_OPT_TM=59  
PRIMER_MIN_TM=57  
PRIMER_MAX_TM=62  
PRIMER_INTERNAL_OPT_SIZE=30  
PRIMER_INTERNAL_MIN_SIZE=25  
PRIMER_INTERNAL_MAX_SIZE=35  
PRIMER_INTERNAL_OPT_TM=66  
PRIMER_INTERNAL_MIN_TM=62  
PRIMER_INTERNAL_MAX_TM=70  
PRIMER_TM_FORMULA=1  
PRIMER_EXPLAIN_FLAG=1  
PRIMER_SECONDARY_STRUCTURE_ALIGNMENT=1  
PRIMER_THERMODYNAMIC_OLIGO_ALIGNMENT=1  
PRIMER_THERMODYNAMIC_TEMPLATE_ALIGNMENT=1  
PRIMER_NUM_RETURN=10  
PRIMER_MAX_HAIRPIN_TH=47.0  
PRIMER_INTERNAL_MAX_HAIRPIN_TH=47.0  
PRIMER_MAX_END_STABILITA=100.0  
=
```



### 3. Detailed results of the dilution series

Note that only the results of dilution experiments in which amplification occurred are shown. In all other cases, the tables would be empty.

The increase is equivalent to the  $\Delta$ CT between two dilution steps and should be between -3.3 and -3.5 for maximum efficiency, while the efficiency is given in %.

#### ***eno***

|             |                    |                |
|-------------|--------------------|----------------|
| Strain ID:  | 124322             |                |
| Gene:       | <i>eno</i>         |                |
| GE/ $\mu$ l | Ct avg.            | Std. dev.      |
| 2,000,000   | 17.661             | 0.142          |
| 200,000     | 20.927             | 0.107          |
| 20,000      | 24.295             | 0.070          |
| 2,000       | 27.477             | 0.187          |
| 200         | 31.008             | 0.140          |
| 20          | 34.892             | 0.044          |
|             |                    |                |
|             | <b>Increase:</b>   | <b>-3.4166</b> |
|             | <b>Efficiency:</b> | <b>96.20</b>   |

|             |                    |                |
|-------------|--------------------|----------------|
| Strain ID:  | 124664             |                |
| Gene:       | <i>eno</i>         |                |
| GE/ $\mu$ l | Ct avg.            | Std. dev.      |
| 2,000,000   | 16.543             | 0.343          |
| 200,000     | 20.207             | 0.294          |
| 20,000      | 23.576             | 0.140          |
| 2,000       | 26.807             | 0.050          |
| 200         | 30.163             | 0.088          |
| 20          | 33.668             | 0.313          |
|             |                    |                |
|             | <b>Increase:</b>   | <b>-3.3839</b> |
|             | <b>Efficiency:</b> | <b>97.48</b>   |

|             |                    |                |
|-------------|--------------------|----------------|
| Strain ID:  | 124670             |                |
| Gene:       | <i>eno</i>         |                |
| GE/ $\mu$ l | Ct avg.            | Std. dev.      |
| 2,000,000   | 18.112             | 0.143          |
| 200,000     | 21.525             | 0.077          |
| 20,000      | 25.050             | 0.004          |
| 2,000       | 28.259             | 0.155          |
| 200         | 31.947             | 0.217          |
| 20          | 35.098             | 0.332          |
|             |                    |                |
|             | <b>Increase:</b>   | <b>-3.4116</b> |
|             | <b>Efficiency:</b> | <b>96.39</b>   |

|             |                    |                |
|-------------|--------------------|----------------|
| Strain ID:  | 124622             |                |
| Gene:       | <i>eno</i>         |                |
| GE/ $\mu$ l | Ct avg.            | Std. dev.      |
| 2,000,000   | 17.424             | 0.300          |
| 200,000     | 20.626             | 0.107          |
| 20,000      | 23.964             | 0.157          |
| 2,000       | 27.380             | 0.045          |
| 200         | 30.823             | 0.115          |
| 20          | 34.483             | 0.391          |
|             |                    |                |
|             | <b>Increase:</b>   | <b>-3.4085</b> |
|             | <b>Efficiency:</b> | <b>96.51</b>   |

|             |                    |                |
|-------------|--------------------|----------------|
| Strain ID:  | 97437              |                |
| Gene:       | <i>eno</i>         |                |
| GE/ $\mu$ l | Ct avg.            | Std. dev.      |
| 2,000,000   | 17.716             | 0.030          |
| 200,000     | 21.181             | 0.097          |
| 20,000      | 24.647             | 0.018          |
| 2,000       | 27.968             | 0.006          |
| 200         | 31.669             | 0.026          |
| 20          | 34.846             | 0.506          |
|             |                    |                |
|             | <b>Increase:</b>   | <b>-3.4411</b> |
|             | <b>Efficiency:</b> | <b>95.26</b>   |

|             |                    |                |
|-------------|--------------------|----------------|
| Strain ID:  | 124982             |                |
| Gene:       | <i>eno</i>         |                |
| GE/ $\mu$ l | Ct avg.            | Std. dev.      |
| 2,000,000   | 17.737             | 0.066          |
| 200,000     | 21.343             | 0.009          |
| 20,000      | 24.666             | 0.019          |
| 2,000       | 28.012             | 0.071          |
| 200         | 31.453             | 0.206          |
| 20          | 34.850             | 0.314          |
|             |                    |                |
|             | <b>Increase:</b>   | <b>-3.4069</b> |
|             | <b>Efficiency:</b> | <b>96.57</b>   |

|             |                    |                |
|-------------|--------------------|----------------|
| Strain ID:  | 124984             |                |
| Gene:       | <i>eno</i>         |                |
| GE/ $\mu$ l | Ct avg.            | Std. dev.      |
| 2,000,000   | 17.467             | 0.096          |
| 200,000     | 20.949             | 0.033          |
| 20,000      | 24.299             | 0.033          |
| 2,000       | 27.638             | 0.026          |
| 200         | 30.987             | 0.000          |
| 20          | 34.646             | 0.295          |
|             |                    |                |
|             | <b>Increase:</b>   | <b>-3.4098</b> |
|             | <b>Efficiency:</b> | <b>96.46</b>   |

|             |                    |                |
|-------------|--------------------|----------------|
| Strain ID:  | 94881              |                |
| Gene:       | <i>eno</i>         |                |
| GE/ $\mu$ l | Ct avg.            | Std. dev.      |
| 2,000,000   | 17.249             | 0.088          |
| 200,000     | 20.860             | 0.169          |
| 20,000      | 24.123             | 0.022          |
| 2,000       | 27.593             | 0.000          |
| 200         | 30.792             | 0.036          |
| 20          | 34.213             | 0.146          |
|             |                    |                |
|             | <b>Increase:</b>   | <b>-3.3739</b> |
|             | <b>Efficiency:</b> | <b>97.88</b>   |

|             |                    |                |
|-------------|--------------------|----------------|
| Strain ID:  | 95377              |                |
| Gene:       | <i>eno</i>         |                |
| GE/ $\mu$ l | Ct avg.            | Std. dev.      |
| 2,000,000   | 17.086             | 0.341          |
| 200,000     | 20.833             | 0.022          |
| 20,000      | 24.282             | 0.043          |
| 2,000       | 27.549             | 0.046          |
| 200         | 30.991             | 0.095          |
| 20          | 34.244             | 0.133          |
|             |                    |                |
|             | <b>Increase:</b>   | <b>-3.4152</b> |
|             | <b>Efficiency:</b> | <b>96.25</b>   |

|             |                    |                |
|-------------|--------------------|----------------|
| Strain ID:  | 95422              |                |
| Gene:       | <i>eno</i>         |                |
| GE/ $\mu$ l | Ct avg.            | Std. dev.      |
| 2,000,000   | 18.384             | 0.023          |
| 200,000     | 21.851             | 0.012          |
| 20,000      | 25.215             | 0.040          |
| 2,000       | 28.576             | 0.050          |
| 200         | 31.924             | 0.099          |
| 20          | 35.387             | 0.835          |
|             |                    |                |
|             | <b>Increase:</b>   | <b>-3.3885</b> |
|             | <b>Efficiency:</b> | <b>97.29</b>   |

|             |                    |                |
|-------------|--------------------|----------------|
| Strain ID:  | 95424              |                |
| Gene:       | <i>eno</i>         |                |
| GE/ $\mu$ l | Ct avg.            | Std. dev.      |
| 2,000,000   | 17.069             | 0.101          |
| 200,000     | 20.628             | 0.043          |
| 20,000      | 23.929             | 0.090          |
| 2,000       | 27.205             | 0.296          |
| 200         | 30.842             | 0.057          |
| 20          | 33.456             | 0.136          |
|             |                    |                |
|             | <b>Increase:</b>   | <b>-3.3101</b> |
|             | <b>Efficiency:</b> | <b>100.50</b>  |

|             |                    |                |
|-------------|--------------------|----------------|
| Strain ID:  | 95427              |                |
| Gene:       | <i>eno</i>         |                |
| GE/ $\mu$ l | Ct avg.            | Std. dev.      |
| 2,000,000   | 17.751             | 0.215          |
| 200,000     | 21.260             | 0.029          |
| 20,000      | 24.752             | 0.023          |
| 2,000       | 28.097             | 0.003          |
| 200         | 36.506             | 0.461          |
| 20          | 34.781             | 0.393          |
|             |                    |                |
|             | <b>Increase:</b>   | <b>-3.8353</b> |
|             | <b>Efficiency:</b> | <b>82.28</b>   |

|             |                    |               |
|-------------|--------------------|---------------|
| Strain ID:  | 95430              |               |
| Gene:       | <i>eno</i>         |               |
| GE/ $\mu$ l | Ct avg.            | Std. dev.     |
| 2,000,000   | 17.762             | 0.141         |
| 200,000     | 21.317             | 0.058         |
| 20,000      | 24.593             | 0.006         |
| 2,000       | 28.056             | 0.041         |
| 200         | 32.031             | 0.082         |
| 20          | 34.708             | 0.010         |
|             |                    |               |
|             | <b>Increase:</b>   | <b>-3.438</b> |
|             | <b>Efficiency:</b> | <b>95.37</b>  |

|             |                    |                |
|-------------|--------------------|----------------|
| Strain ID:  | 124717             |                |
| Gene:       | <i>eno</i>         |                |
| GE/ $\mu$ l | Ct avg.            | Std. dev.      |
|             |                    |                |
| 2,000,000   | 18.228             | 0.028          |
| 200,000     | 21.655             | 1.867          |
| 20,000      | 24.918             | 0.098          |
| 2,000       | 28.300             | 0.080          |
| 200         | 31.734             | 0.024          |
| 20          | 38.072             | 0.548          |
|             |                    |                |
|             | <b>Increase:</b>   | <b>-3.7954</b> |
|             | <b>Efficiency:</b> | <b>83.43</b>   |

## *mecC*

|             |                    |                |
|-------------|--------------------|----------------|
| Strain ID:  | 94881              |                |
| Gene:       | <i>mecC</i>        |                |
| GE/ $\mu$ l | Ct avg.            | Std. dev.      |
| 2,000,000   | 17.336             | 0.001          |
| 200,000     | 20.882             | 0.094          |
| 20,000      | 24.242             | 0.015          |
| 2,000       | 27.902             | 0.071          |
| 200         | 31.093             | 0.036          |
| 20          | 34.865             | 0.323          |
|             |                    |                |
|             | <b>Increase:</b>   | <b>-3.4839</b> |
|             | <b>Efficiency:</b> | <b>93.66</b>   |

|             |                    |               |
|-------------|--------------------|---------------|
| Strain ID:  | 95377              |               |
| Gene:       | <i>mecC</i>        |               |
| GE/ $\mu$ l | Ct avg.            | Std. dev.     |
| 2,000,000   | 17.507             | 0.120         |
| 200,000     | 21.083             | 0.180         |
| 20,000      | 24.444             | 0.007         |
| 2,000       | 27.718             | 0.031         |
| 200         | 31.130             | 0.155         |
| 20          | 34.848             | 0.051         |
|             |                    |               |
|             | <b>Increase:</b>   | <b>-3.432</b> |
|             | <b>Efficiency:</b> | <b>95.60</b>  |

|             |                    |                |
|-------------|--------------------|----------------|
| Strain ID:  | 95422              |                |
| Gene:       | <i>mecC</i>        |                |
| GE/ $\mu$ l | Ct avg.            | Std. dev.      |
| 2,000,000   | 18.035             | 0.101          |
| 200,000     | 21.652             | 0.099          |
| 20,000      | 24.983             | 0.084          |
| 2,000       | 28.237             | 0.113          |
| 200         | 31.636             | 0.099          |
| 20          | 35.143             | 0.570          |
|             |                    |                |
|             | <b>Increase:</b>   | <b>-3.3928</b> |
|             | <b>Efficiency:</b> | <b>97.13</b>   |



### *fusC*

|             |                    |                |
|-------------|--------------------|----------------|
| Strain ID:  | 124717             |                |
| Gene:       | <i>fusC</i>        |                |
| GE/ $\mu$ l | Ct avg.            | Std. dev.      |
| 2,000,000   | 16.768             | 0.363          |
| 200,000     | 19.729             | 0.372          |
| 20,000      | 24.193             | 0.944          |
| 2,000       | 26.588             | 1.041          |
| 200         | 30.009             | 0.663          |
| 20          | 33.207             | 0.617          |
|             |                    |                |
|             | <b>Increase:</b>   | <b>-3.2979</b> |
|             | <b>Efficiency:</b> | <b>101.01</b>  |

### *lukF-PV (human)*

|             |                    |                |
|-------------|--------------------|----------------|
| Strain ID:  | 124322             |                |
| Gene:       | <i>lukF-PV</i>     |                |
| GE/ $\mu$ l | Ct avg.            | Std. dev.      |
| 2,000,000   | 18.812             | 0.225          |
| 200,000     | 22.925             | 0.553          |
| 20,000      | 26.344             | 0.226          |
| 2,000       | 30.323             | 0.043          |
| 200         | 33.795             | 0.226          |
| 20          | 37.617             | 0.322          |
|             |                    |                |
|             | <b>Increase:</b>   | <b>-3.7318</b> |
|             | <b>Efficiency:</b> | <b>85.34</b>   |

|             |                    |               |
|-------------|--------------------|---------------|
| Strain ID:  | 124664             |               |
| Gene:       | <i>lukF-PV</i>     |               |
| GE/ $\mu$ l | Ct avg.            | Std. dev.     |
| 2,000,000   | 18.538             | 0.285         |
| 200,000     | 22.610             | 0.061         |
| 20,000      | 26.378             | 0.087         |
| 2,000       | 29.976             | 0.006         |
| 200         | 33.685             | 0.175         |
| 20          | 37.655             | 0.387         |
|             |                    |               |
|             | <b>Increase:</b>   | <b>-3.783</b> |
|             | <b>Efficiency:</b> | <b>83.80</b>  |

|             |                    |                |
|-------------|--------------------|----------------|
| Strain ID:  | 124670             |                |
| Gene:       | <i>lukF-PV</i>     |                |
| GE/ $\mu$ l | Ct avg.            | Std. dev.      |
| 2,000,000   | 19.602             | 0.001          |
| 200,000     | 23.677             | 0.047          |
| 20,000      | 27.340             | 0.004          |
| 2,000       | 31.041             | 0.062          |
| 200         | 34.600             | 0.010          |
| 20          | 38.170             | 0.151          |
|             |                    |                |
|             | <b>Increase:</b>   | <b>-3.6946</b> |
|             | <b>Efficiency:</b> | <b>86.49</b>   |

|             |                    |                |
|-------------|--------------------|----------------|
| Strain ID:  | 95430              |                |
| Gene:       | <i>lukF-PV</i>     |                |
| GE/ $\mu$ l | Ct avg.            | Std. dev.      |
| 2,000,000   | 19.520             | 0.275          |
| 200,000     | 23.601             | 0.201          |
| 20,000      | 27.307             | 0.202          |
| 2,000       | 30.979             | 0.509          |
| 200         | 35.031             | 0.218          |
| 20          | 38.321             | 0.284          |
|             |                    |                |
|             | <b>Increase:</b>   | <b>-3.7705</b> |
|             | <b>Efficiency:</b> | <b>84.17</b>   |

### ***lukF-PV(P83) (bovine)***

|             |                    |                |
|-------------|--------------------|----------------|
| Strain ID:  | 124622             |                |
| Gene:       | <i>lukF-b</i>      |                |
| GE/ $\mu$ l | Ct avg.            | Std. dev.      |
| 2,000,000   | 16.119             | 0.136          |
| 200,000     | 19.487             | 0.316          |
| 20,000      | 22.778             | 0.088          |
| 2,000       | 26.260             | 0.004          |
| 200         | 31.832             | 0.038          |
| 20          | 34.152             | 0.882          |
|             |                    |                |
|             | <b>Increase:</b>   | <b>-3.7337</b> |
|             | <b>Efficiency:</b> | <b>85.28</b>   |

|             |                    |                |
|-------------|--------------------|----------------|
| Strain ID:  | 97437              |                |
| Gene:       | <i>lukF-b</i>      |                |
| GE/ $\mu$ l | Ct avg.            | Std. dev.      |
| 2,000,000   | 17.907             | 0.066          |
| 200,000     | 21.672             | 0.073          |
| 20,000      | 24.902             | 0.076          |
| 2,000       | 28.328             | 0.152          |
| 200         | 31.874             | 0.042          |
| 20          | 35.527             | 0.928          |
|             |                    |                |
|             | <b>Increase:</b>   | <b>-3.4895</b> |
|             | <b>Efficiency:</b> | <b>93.45</b>   |

|             |                    |                |
|-------------|--------------------|----------------|
| Strain ID:  | 124982             |                |
| Gene:       | <i>lukF-b</i>      |                |
| GE/ $\mu$ l | Ct avg.            | Std. dev.      |
| 2,000,000   | 15.947             | 0.423          |
| 200,000     | 19.267             | 0.025          |
| 20,000      | 22.822             | 0.108          |
| 2,000       | 27.922             | 0.295          |
| 200         | 30.898             | 0.029          |
| 20          | 33.894             | 0.328          |
|             |                    |                |
|             | <b>Increase:</b>   | <b>-3.7064</b> |
|             | <b>Efficiency:</b> | <b>86.12</b>   |

|             |                    |                |
|-------------|--------------------|----------------|
| Strain ID:  | 124984             |                |
| Gene:       | <i>lukF-b</i>      |                |
| GE/ $\mu$ l | Ct avg.            | Std. dev.      |
| 2,000,000   | 15.712             | 0.008          |
| 200,000     | 19.248             | 0.003          |
| 20,000      | 22.523             | 0.227          |
| 2,000       | 26.447             | 0.142          |
| 200         | 30.580             | 0.104          |
| 20          | 33.710             | 0.160          |
|             |                    |                |
|             | <b>Increase:</b>   | <b>-3.6545</b> |
|             | <b>Efficiency:</b> | <b>87.77</b>   |

***entA (sea)***

|             |                    |                |
|-------------|--------------------|----------------|
| Strain ID:  | 124664             |                |
| Gene:       | <i>entA</i>        |                |
| GE/ $\mu$ l | Ct avg.            | Std. dev.      |
| 2,000,000   | 16.611             | 0.161          |
| 200,000     | 19.641             | 0.878          |
| 20,000      | 23.382             | 0.042          |
| 2,000       | 26.905             | 0.202          |
| 200         | 30.122             | 0.237          |
| 20          | 33.832             | 0.824          |
|             |                    |                |
|             | <b>Increase:</b>   | <b>-3.4591</b> |
|             | <b>Efficiency:</b> | <b>94.58</b>   |

|             |                    |                |
|-------------|--------------------|----------------|
| Strain ID:  | 124717             |                |
| Gene:       | <i>entA</i>        |                |
| GE/ $\mu$ l | Ct avg.            | Std. dev.      |
| 2,000,000   | 17.016             | 0.093          |
| 200,000     | 20.262             | 0.188          |
| 20,000      | 23.839             | 0.235          |
| 2,000       | 27.283             | 0.132          |
| 200         | 30.864             | 0.181          |
| 20          | 33.939             | 0.025          |
|             |                    |                |
|             | <b>Increase:</b>   | <b>-3.4246</b> |
|             | <b>Efficiency:</b> | <b>95.89</b>   |

***entB (seb)***

|             |                    |                |
|-------------|--------------------|----------------|
| Strain ID:  | 124670             |                |
| Gene:       | <i>entB</i>        |                |
| GE/ $\mu$ l | Ct avg.            | Std. dev.      |
| 2,000,000   | 17.236             | 0.336          |
| 200,000     | 21.434             | 0.095          |
| 20,000      | 25.013             | 0.213          |
| 2,000       | 28.937             | 0.112          |
| 200         | 33.595             | 0.050          |
| 20          | 34.603             | 0.465          |
|             |                    |                |
|             | <b>Increase:</b>   | <b>-3.6355</b> |
|             | <b>Efficiency:</b> | <b>88.39</b>   |
